# Supplementary material for: The 3D porous metal–organic frameworks based on bis(pyrazinyl)–trizole: structures, photoluminescence and gas adsorption properties
Source: Royal Society of Chemistry journal article supplement (doi:10.1039/c3ce40574e), 2013-01-01
Supplement: c3ce40574e.pdf [file c3ce40574e.pdf]

# **The 3D Porous Metal-Organic Frameworks Based on Bis(pyrazinyl)-triazole: Structures, Photoluminescence and Gas Adsorption Properties**

Jie Pan,<sup>ab</sup> Fei-Long Jiang,<sup>a</sup> Da-Qiang Yuan,<sup>a</sup> Xiao-Chen Shan,<sup>ab</sup> Ming-Yan Wu,<sup>a</sup> Kang Zhou,<sup>ab</sup> Yan-Li Gai,<sup>ab</sup> Xing-Jun Li<sup>ab</sup> and Mao-Chun Hong<sup>\*a</sup>

<sup>a</sup>State Key Laboratory of Structure Chemistry, Fujian Institute of Research on the Structure of Matter, Chinese Academy of Sciences, Fuzhou, 350002, China

<sup>b</sup>Graduate School of the Chinese Academy of Sciences, Beijing, 100049, China

To whom correspondence should be addressed. Tel: +86-591-83792460. Fax: +86-591-83794946. E-mail: [hmc@fjirsm.ac.cn](mailto:hmc@fjirsm.ac.cn)

1. Selected Bond Lengths (Å) and Angles (deg) for Complexes **1** and **2**.

Table S1. Selected Bond Lengths (Å) and Angles (deg) for Complexes **1** and **2**.

| Complex <b>1</b> <sup>a</sup>          |             |                                         |             |
|----------------------------------------|-------------|-----------------------------------------|-------------|
| Zn1—O1                                 | 1.9754 (19) | Zn1—O3 <sup>i</sup>                     | 2.0190 (18) |
| Zn1—N3                                 | 2.0193 (18) | Zn1—N1 <sup>ii</sup>                    | 2.119 (2)   |
| Zn1—O2 <sup>i</sup>                    | 2.403 (2)   |                                         |             |
| O1—Zn1—O3 <sup>i</sup>                 | 98.28 (9)   | O1—Zn1—N3                               | 107.09 (8)  |
| O3 <sup>i</sup> —Zn1—N3                | 147.57 (9)  | O1—Zn1—N1 <sup>ii</sup>                 | 99.67 (10)  |
| O3 <sup>i</sup> —Zn1—N1 <sup>ii</sup>  | 101.85 (9)  | O1—Zn1—O2 <sup>i</sup>                  | 91.33 (8)   |
| O3 <sup>i</sup> —Zn1—O2 <sup>i</sup>   | 58.06 (7)   | N3—Zn1—O2 <sup>i</sup>                  | 100.73 (9)  |
| N1 <sup>ii</sup> —Zn1—O2 <sup>i</sup>  | 150.65 (8)  | O3 <sup>i</sup> —Zn1—N1 <sup>ii</sup>   | 93.26 (8)   |
| Complex <b>2</b> <sup>b</sup>          |             |                                         |             |
| Cd1—O1                                 | 2.231 (5)   | Cd1—O2 <sup>i</sup>                     | 2.313 (5)   |
| Cd1—O5 <sup>ii</sup>                   | 2.335 (5)   | Cd1—N1 <sup>iii</sup>                   | 2.357 (5)   |
| Cd1—N7                                 | 2.366 (5)   | Cd1—O6 <sup>ii</sup>                    | 2.443 (5)   |
| Cd2—O4 <sup>iv</sup>                   | 2.234 (5)   | Cd2—O8                                  | 2.297 (6)   |
| Cd2—N5                                 | 2.341 (5)   | Cd2—N4 <sup>v</sup>                     | 2.346 (5)   |
| Cd2—N2 <sup>v</sup>                    | 2.504 (6)   | Cd2—N6                                  | 2.524 (6)   |
| O1—Cd1—O2 <sup>i</sup>                 | 134.0 (2)   | O1—Cd1—O5 <sup>ii</sup>                 | 90.4 (2)    |
| O2 <sup>i</sup> —Cd1—O5 <sup>ii</sup>  | 135.54 (18) | O1—Cd1—N1 <sup>iii</sup>                | 93.8 (2)    |
| O2 <sup>i</sup> —Cd1—N1 <sup>iii</sup> | 84.17 (19)  | O5 <sup>ii</sup> —Cd1—N1 <sup>iii</sup> | 94.87 (19)  |
| O1—Cd1—N7                              | 94.38 (19)  | O2 <sup>i</sup> —Cd1—N7                 | 86.75 (18)  |
| O5 <sup>ii</sup> —Cd1—N7               | 89.80 (18)  | N1 <sup>iii</sup> —Cd1—N7               | 170.6 (2)   |
| O1—Cd1—O6 <sup>ii</sup>                | 145.27 (19) | O2 <sup>i</sup> —Cd1—O6 <sup>ii</sup>   | 80.68 (18)  |
| O5 <sup>ii</sup> —Cd1—O6 <sup>ii</sup> | 54.89 (17)  | N1 <sup>iii</sup> —Cd1—O6 <sup>ii</sup> | 88.15 (16)  |
| N7—Cd1—O6 <sup>ii</sup>                | 87.85 (16)  | O4 <sup>iv</sup> —Cd2—O8                | 164.6 (2)   |
| O4 <sup>iv</sup> —Cd2—N5               | 97.26 (19)  | O8—Cd2—N5                               | 93.37 (19)  |
| O4 <sup>iv</sup> —Cd2—N4 <sup>v</sup>  | 96.36 (19)  | O8—Cd2—N4 <sup>v</sup>                  | 95.77 (19)  |
| N5—Cd2—N4 <sup>v</sup>                 | 84.11 (19)  | O4 <sup>iv</sup> —Cd2—N2 <sup>v</sup>   | 95.34 (19)  |
| O8—Cd2—N2 <sup>v</sup>                 | 79.97 (18)  | N5—Cd2—N2 <sup>v</sup>                  | 152.37 (17) |
| N4 <sup>v</sup> —Cd2—N2 <sup>v</sup>   | 70.09 (18)  | O4 <sup>iv</sup> —Cd2—N6                | 90.09 (19)  |
| O8—Cd2—N6                              | 83.06 (18)  | N5—Cd2—N6                               | 70.20 (19)  |
| N4 <sup>v</sup> —Cd2—N6                | 154.12 (18) | N2 <sup>v</sup> —Cd2—N6                 | 134.34 (19) |

<sup>a</sup> Symmetry codes: (i) 1/2+x, 1/2-y, 1/4-z; (ii) -1/2+x, 3/2-y, 1/4-z; (iii) -1/2+x, 1/2-y, 1/4-z; (iv) 1/2+x, 3/2-y, 1/4-z; (v) y, x, -z. <sup>b</sup>Symmetry codes: (i) 1-x, y, 1/2-z; (ii) x, 1-y, -1/2+z; (iii) 1-x, 1-y, -z; (iv) 1/2-x, -1/2+y, 1/2-z; (v) 1-x, -y, -z; (vi) x, 1-y, 1/2+z; (vii) 1/2-x, 1/2+y, 1/2-z.

2. TGA curves of the samples after immersed in methanol and dehydrated.

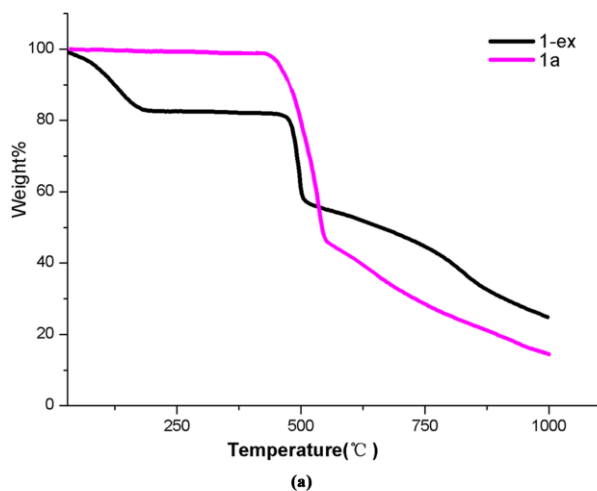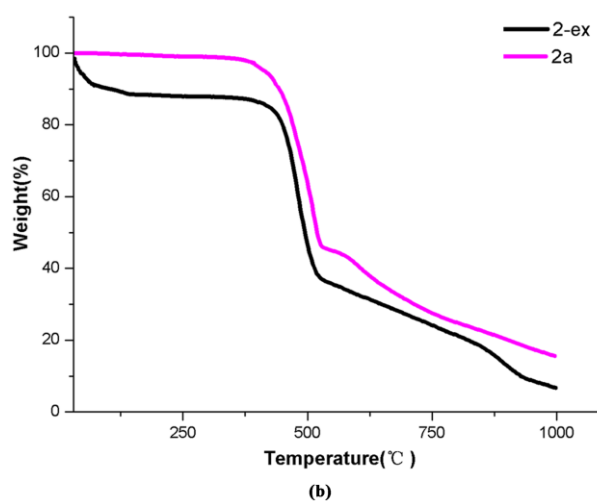

Figure S1. (a) TGA curves of 1-ex and 1a; (b) TGA curves of 2-ex and 2a.

3. PXRD patterns of the samples after immersed in methanol and dehydrated.

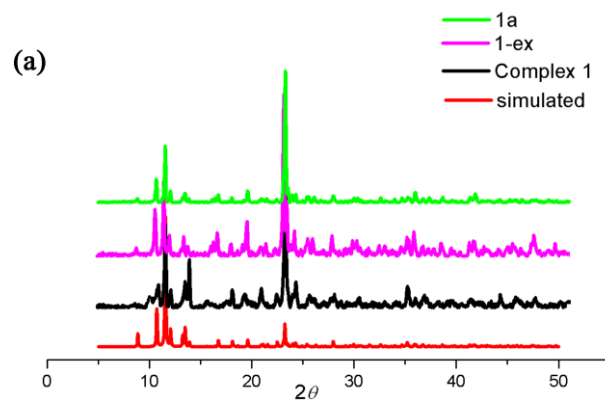

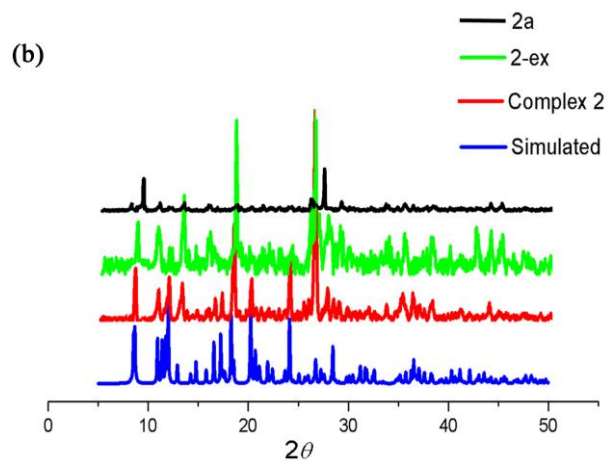

**Figure S2.** (a) PXR D patterns of simulated one and complex **1**, **1-ex** and **1a**;  
(b) PXR D patterns of simulated one and complex **2**, **2-ex** and **2a**.

#### 4. Coverage dependency of the isosteric heat of adsorption for CO<sub>2</sub> and CH<sub>4</sub> in **1a**.

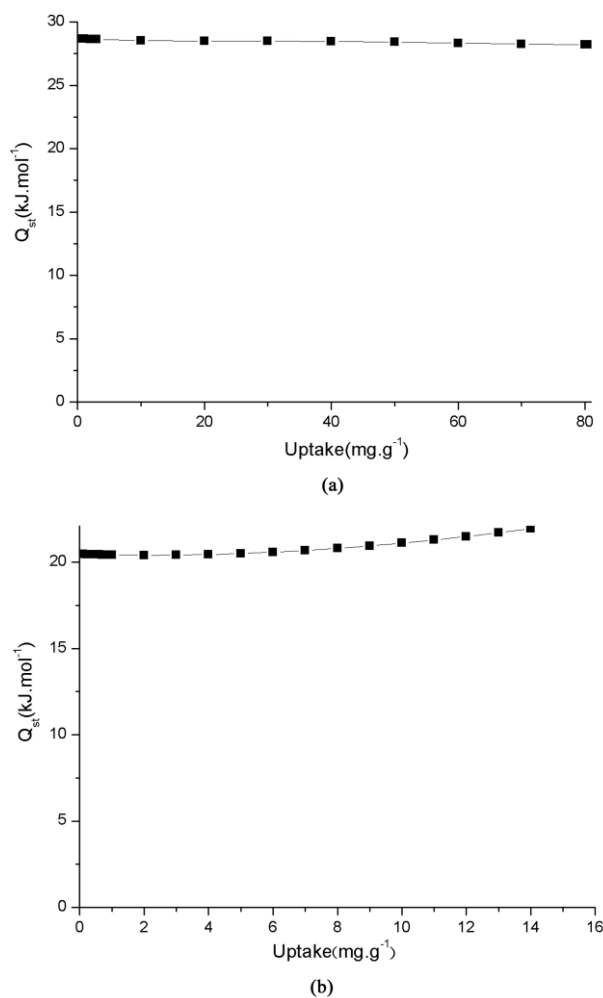

**Figure S3.** (a) Coverage dependency of the isosteric heat of adsorption for CO<sub>2</sub> in **1a**; (b) Coverage dependency of the isosteric heat of adsorption for CH<sub>4</sub> in **1a**.

5. Crystal photographs of **1** under UV irradiation at room temperature.

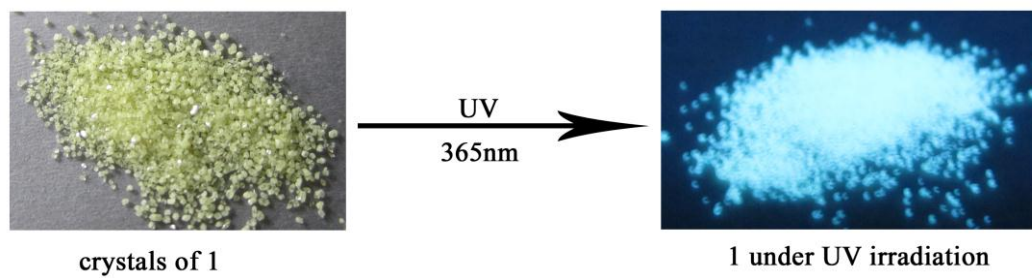

**Figure S4.** Crystal photographs of **1** under UV irradiation at room temperature.
